# Supplementary material for: Prevalence of fermented foods in the Dutch adult diet and validation of a food frequency questionnaire for estimating their intake in the NQplus cohort
Source: PubMed Central journal article supplement (PMC7712622; doi:10.1186/s40795-020-00394-z), 2020-12-03
Supplement: 40795_2020_394_MOESM1_ESM.pdf [file 40795_2020_394_MOESM1_ESM.pdf]

| <b>Table S1 Identification and Classification of Fermented Foods from the FFQ and 24-h Recalls in NQplus<sup>a</sup></b> |                            |                      |                    |                                     |                             |
|--------------------------------------------------------------------------------------------------------------------------|----------------------------|----------------------|--------------------|-------------------------------------|-----------------------------|
| <b>Food<sup>b</sup></b>                                                                                                  | <b>Fermentation Status</b> | <b>Food Group</b>    | <b>Subgroup</b>    | <b>(Main) Fermentation Organism</b> | <b>Mean intakes (g/day)</b> |
| <b>Food Frequency Questionnaire</b>                                                                                      |                            |                      |                    |                                     |                             |
| Beer                                                                                                                     | Fermented                  | Beverages            | Beer               | Yeast                               | 83.69                       |
| Low -alcohol beer                                                                                                        | Fermented                  | Beverages            | Beer               | Yeast                               | 3.92                        |
| Coffee                                                                                                                   | Fermented                  | Beverages            | Coffee             | Endogenous microorganisms           | 452.67                      |
| Wine, other                                                                                                              | Fermented                  | Beverages            | Wine               | Endogenous microorganisms           | 19.24                       |
| Wine, red                                                                                                                | Fermented                  | Beverages            | Wine               | Endogenous microorganisms           | 46.29                       |
| Brow n bread                                                                                                             | Fermented                  | Cereals/grains       | Bread, brow n      | Yeast                               | 3.18                        |
| Brow n bread (sliced)                                                                                                    | Fermented                  | Cereals/grains       | Bread, brow n      | Yeast                               | 21.54                       |
| Bread w ith raisins                                                                                                      | Fermented                  | Cereals/grains       | Bread, other       | Yeast                               | 8.63                        |
| Rye bread                                                                                                                | Fermented                  | Cereals/grains       | Bread, rye         | Yeast                               | 2.91                        |
| Biscuit (bread), w hite                                                                                                  | Fermented                  | Cereals/grains       | Bread, w hite      | Yeast                               | 0.69                        |
| White bread                                                                                                              | Fermented                  | Cereals/grains       | Bread, w hite      | Yeast                               | 3.35                        |
| White bread (sliced)                                                                                                     | Fermented                  | Cereals/grains       | Bread, w hite      | Yeast                               | 4.57                        |
| Biscuit (bread), w hole w heat                                                                                           | Fermented                  | Cereals/grains       | Bread, w holegrain | Yeast                               | 1.69                        |
| Multiple grain bread                                                                                                     | Fermented                  | Cereals/grains       | Bread, w holegrain | Yeast                               | 2.66                        |
| Multiple grain bread (sliced)                                                                                            | Fermented                  | Cereals/grains       | Bread, w holegrain | Yeast                               | 29.74                       |
| Whole w heat bread (sliced)                                                                                              | Fermented                  | Cereals/grains       | Bread, w holegrain | Yeast                               | 46.89                       |
| Croissant                                                                                                                | Fermented                  | Cereals/grains       | Pastry             | Yeast                               | 1.85                        |
| Milk chocolate                                                                                                           | Fermented                  | Cocoa-based products | Chocolate          | Endogenous microorganisms           | 1.94                        |
| Pure chocolate                                                                                                           | Fermented                  | Cocoa-based products | Chocolate          | Endogenous microorganisms           | 2.94                        |
| White chocolate                                                                                                          | Fermented                  | Cocoa-based products | Chocolate          | Endogenous microorganisms           | 0.53                        |
| Buttermilk                                                                                                               | Fermented                  | Dairy                | Buttermilk         | Bacteria                            | 43.46                       |

|                              |                                                                             |       |                     |                |       |
|------------------------------|-----------------------------------------------------------------------------|-------|---------------------|----------------|-------|
| Low -fat cheese (20+/30+)    | Fermented                                                                   | Dairy | Cheese, hard        | Bacteria       | 5.12  |
| Regular cheese (40+)         | Fermented                                                                   | Dairy | Cheese, hard        | Bacteria       | 1.67  |
| Regular cheese (48+)         | Fermented                                                                   | Dairy | Cheese, hard        | Bacteria       | 12.47 |
| Cheese as snack              | Fermented                                                                   | Dairy | Cheese, unspecified | Bacteria       | 3.23  |
| Cheese with hot meal         | Fermented                                                                   | Dairy | Cheese, unspecified | Bacteria       | 3.08  |
| Fat luxury cheese            | Fermented                                                                   | Dairy | Cheese, unspecified | Bacteria       | 1.86  |
| Less-fat luxury cheese       | Fermented                                                                   | Dairy | Cheese, unspecified | Bacteria       | 1.99  |
| Unknown cheese               | Fermented                                                                   | Dairy | Cheese, unspecified | Bacteria       | 0.58  |
| (Fruit) quark with breakfast | Fermented                                                                   | Dairy | Quark               | Bacteria       | 3.43  |
| Full (fruit) yoghurt         | Fermented                                                                   | Dairy | Yoghurt             | Bacteria       | 4.45  |
| Full yoghurt                 | Fermented                                                                   | Dairy | Yoghurt             | Bacteria       | 12.08 |
| Semi-skim (fruit) yoghurt    | Fermented                                                                   | Dairy | Yoghurt             | Bacteria       | 5.73  |
| Semi-skim yoghurt            | Fermented                                                                   | Dairy | Yoghurt             | Bacteria       | 24.75 |
| Skim (fruit) yoghurt         | Fermented                                                                   | Dairy | Yoghurt             | Bacteria       | 13.51 |
| Skim yoghurt                 | Fermented                                                                   | Dairy | Yoghurt             | Bacteria       | 31.93 |
| Unknown yoghurt              | Fermented                                                                   | Dairy | Yoghurt             | Bacteria       | 3.15  |
| Marmite                      | Fermented                                                                   | Other | Marmite             | Yeast          | 0.02  |
| Dressing of oil/vinegar      | Fermented                                                                   | Other | Vinegar             | Bacteria/yeast | 1.34  |
| Sandwich sausage             | Unclear if sausage is fermented.                                            | NA    | NA                  | NA             | 3.05  |
| Chocolate spread             | Composite dish/contains a fermented ingredient but is not itself fermented. | NA    | NA                  | NA             | 4.92  |
| Breakfast drink              | Composite dish/contains a fermented ingredient but is not itself fermented. | NA    | NA                  | NA             | 3.28  |
| Mousse (dessert)             | Composite dish/contains a fermented ingredient but is not itself fermented. | NA    | NA                  | NA             | 5.28  |
| Pizza                        | Composite dish/contains a fermented ingredient but is not itself fermented. | NA    | NA                  | NA             | 12.37 |
| Dressing of light mayonnaise | Composite dish/contains a fermented ingredient but is not itself fermented. | NA    | NA                  | NA             | 1.68  |
| Dressing of mayonnaise       | Composite dish/contains a fermented ingredient but is not itself fermented. | NA    | NA                  | NA             | 0.25  |

|                                        |                                                                             |           |        |                           |        |
|----------------------------------------|-----------------------------------------------------------------------------|-----------|--------|---------------------------|--------|
| Mayonnaise                             | Composite dish/contains a fermented ingredient but is not itself fermented. | NA        | NA     | NA                        | 0.85   |
| Light mayonnaise                       | Composite dish/contains a fermented ingredient but is not itself fermented. | NA        | NA     | NA                        | 1.19   |
| Ketchup                                | Composite dish/contains a fermented ingredient but is not itself fermented. | NA        | NA     | NA                        | 1.44   |
| Nutrition biscuit                      | Unclear if yeast is used in the cooking process.                            | NA        | NA     | NA                        | 4.05   |
| Mayonnaise with snack                  | Composite dish/contains a fermented ingredient but is not itself fermented. | NA        | NA     | NA                        | 0.16   |
| Light mayonnaise with snack            | Composite dish/contains a fermented ingredient but is not itself fermented. | NA        | NA     | NA                        | 0.17   |
| Ketchup with snack                     | Composite dish/contains a fermented ingredient but is not itself fermented. | NA        | NA     | NA                        | 0.28   |
| Eggnog                                 | Composite dish/contains a fermented ingredient but is not itself fermented. | NA        | NA     | NA                        | 0.20   |
| Strong drink                           | Unclear if this is an alcoholic drink that is produced by fermentation.     | NA        | NA     | NA                        | 4.01   |
| Skim milk or buttermilk                | Unclear category (will check how highly reported and intake level).         | NA        | NA     | NA                        | 2.08   |
| Whole wheat cracker                    | Unclear if yeast is used in the cooking process.                            | NA        | NA     | NA                        | 1.88   |
| Liver sausage                          | Unclear if sausage is fermented.                                            | NA        | NA     | NA                        | 0.42   |
| <b>24-h Recall</b>                     |                                                                             |           |        |                           |        |
| Beer, >7 vol% alcohol                  | Fermented                                                                   | Beverages | Beer   | Yeast                     | 382.25 |
| Beer, alcohol free <0.1 vol% alcohol   | Fermented                                                                   | Beverages | Beer   | Yeast                     | 341.49 |
| Beer, brown                            | Fermented                                                                   | Beverages | Beer   | Yeast                     | 388.57 |
| Beer, low alcohol 0.1-1.2 vol% alcohol | Fermented                                                                   | Beverages | Beer   | Yeast                     | 250.00 |
| Beer, pilsner (pale lager)             | Fermented                                                                   | Beverages | Beer   | Yeast                     | 464.51 |
| Beer with fruit flavour                | Fermented                                                                   | Beverages | Beer   | Yeast                     | 330.00 |
| Cider                                  | Fermented                                                                   | Beverages | Cider  | Yeast                     | 211.67 |
| Cappuccino, freshly made               | Fermented                                                                   | Beverages | Coffee | Endogenous microorganisms | 199.67 |

|                                                 |           |                |                 |                           |        |
|-------------------------------------------------|-----------|----------------|-----------------|---------------------------|--------|
| Coffee, prepared                                | Fermented | Beverages      | Coffee          | Endogenous microorganisms | 209.08 |
| Coffee, cappuccino instant prepared             | Fermented | Beverages      | Coffee, instant | Endogenous microorganisms | 236.56 |
| Coffee with milk from vending machine           | Fermented | Beverages      | Coffee, instant | Endogenous microorganisms | 302.27 |
| Coffee with sugar and milk from vending machine | Fermented | Beverages      | Coffee, instant | Endogenous microorganisms | 222.79 |
| Madeira                                         | Fermented | Beverages      | Wine            | Endogenous microorganisms | 35.67  |
| Port wine                                       | Fermented | Beverages      | Wine            | Endogenous microorganisms | 74.28  |
| Sherry                                          | Fermented | Beverages      | Wine            | Endogenous microorganisms | 81.66  |
| Medicinal wine (pleegzusterbloedwijn)           | Fermented | Beverages      | Wine            | Endogenous microorganisms | 75.00  |
| Wine, red                                       | Fermented | Beverages      | Wine            | Endogenous microorganisms | 151.68 |
| Wine, rose                                      | Fermented | Beverages      | Wine            | Endogenous microorganisms | 157.12 |
| Wine, white dry                                 | Fermented | Beverages      | Wine            | Endogenous microorganisms | 151.79 |
| Wine, white sweet                               | Fermented | Beverages      | Wine            | Endogenous microorganisms | 129.42 |
| Baguette, brown                                 | Fermented | Cereals/grains | Bread, brown    | Yeast                     | 65.52  |
| Bread (Blue Brand Goede Start), light brown     | Fermented | Cereals/grains | Bread, brown    | Yeast                     | 70.00  |
| Bread brown with pumpkin seeds                  | Fermented | Cereals/grains | Bread, brown    | Yeast                     | 78.57  |
| Bread brown with seeds                          | Fermented | Cereals/grains | Bread, brown    | Yeast                     | 71.27  |
| Bread brown with sunflower seeds                | Fermented | Cereals/grains | Bread, brown    | Yeast                     | 71.26  |
| Bread brown wheat                               | Fermented | Cereals/grains | Bread, brown    | Yeast                     | 70.76  |
| Bread brown/w holemeal with muesli              | Fermented | Cereals/grains | Bread, brown    | Yeast                     | 51.89  |
| Bread brown/w holemeal with pumpkin seeds       | Fermented | Cereals/grains | Bread, brown    | Yeast                     | 61.76  |

|                                              |           |                |                |       |       |
|----------------------------------------------|-----------|----------------|----------------|-------|-------|
| Bread brown/w holemeal w ith sunflower seeds | Fermented | Cereals/grains | Bread, brown   | Yeast | 73.04 |
| Roll brown, hard                             | Fermented | Cereals/grains | Bread, brown   | Yeast | 68.01 |
| Roll brown, soft                             | Fermented | Cereals/grains | Bread, brown   | Yeast | 76.25 |
| Baguette w ith cheese-onion                  | Fermented | Cereals/grains | Bread, other   | Yeast | 79.00 |
| Bread, ciabatta, no filling                  | Fermented | Cereals/grains | Bread, other   | Yeast | 87.65 |
| Bread, currant                               | Fermented | Cereals/grains | Bread, other   | Yeast | 49.83 |
| Bread, currant w ith almond paste            | Fermented | Cereals/grains | Bread, other   | Yeast | 47.03 |
| Bread, linseed                               | Fermented | Cereals/grains | Bread, other   | Yeast | 48.25 |
| Bread loaf, gluten-free, Glutafin            | Fermented | Cereals/grains | Bread, other   | Yeast | 78.11 |
| Bread, low in carbohydrates                  | Fermented | Cereals/grains | Bread, other   | Yeast | 53.45 |
| Bread, raisin                                | Fermented | Cereals/grains | Bread, other   | Yeast | 52.47 |
| Bread, raisin/current average                | Fermented | Cereals/grains | Bread, other   | Yeast | 48.81 |
| Bread ,w heat malt Tarvo                     | Fermented | Cereals/grains | Bread, other   | Yeast | 79.80 |
| Bun, currant/raisin                          | Fermented | Cereals/grains | Bread, other   | Yeast | 58.21 |
| Bun w ith vanilla custard                    | Fermented | Cereals/grains | Bread, other   | Yeast | 76.67 |
| Coconut bread, sw eetened, sliced            | Fermented | Cereals/grains | Bread, other   | Yeast | 10.71 |
| Stollen w ith almond/paste, average          | Fermented | Cereals/grains | Bread, other   | Yeast | 73.31 |
| Stollen w ith almond/paste w ith nuts        | Fermented | Cereals/grains | Bread, other   | Yeast | 62.56 |
| Stollen w ith almond/paste w ithout nuts     | Fermented | Cereals/grains | Bread, other   | Yeast | 56.00 |
| Bread, rye, average                          | Fermented | Cereals/grains | Bread, rye     | Yeast | 53.37 |
| Bread, rye, dark                             | Fermented | Cereals/grains | Bread, rye     | Yeast | 46.31 |
| Bread, rye, light                            | Fermented | Cereals/grains | Bread, rye     | Yeast | 72.77 |
| Bread crumbs                                 | Fermented | Cereals/grains | Bread, toasted | Yeast | 9.11  |
| Crackers cream                               | Fermented | Cereals/grains | Bread, toasted | Yeast | 15.08 |
| Crackers cream, low sodium                   | Fermented | Cereals/grains | Bread, toasted | Yeast | 26.22 |
| Crispbakes, Dutch                            | Fermented | Cereals/grains | Bread, toasted | Yeast | 12.19 |
| Crispbakes, Dutch w holemeal                 | Fermented | Cereals/grains | Bread, toasted | Yeast | 13.42 |
| Crispbread, average                          | Fermented | Cereals/grains | Bread, toasted | Yeast | 18.05 |

|                                          |           |                |                                |       |       |
|------------------------------------------|-----------|----------------|--------------------------------|-------|-------|
| Crispbread, Cracottes                    | Fermented | Cereals/grains | Bread, toasted                 | Yeast | 13.08 |
| Crispbread, Cracottes Vital              | Fermented | Cereals/grains | Bread, toasted                 | Yeast | 22.50 |
| Crispbread, gold-brown                   | Fermented | Cereals/grains | Bread, toasted                 | Yeast | 17.74 |
| Crispbread, high fibre                   | Fermented | Cereals/grains | Bread, toasted                 | Yeast | 17.63 |
| Crispbread, light                        | Fermented | Cereals/grains | Bread, toasted                 | Yeast | 9.35  |
| Crispbread, poppy seeds                  | Fermented | Cereals/grains | Bread, toasted                 | Yeast | 30.00 |
| Crispbread, sandwich Wasa                | Fermented | Cereals/grains | Bread, toasted                 | Yeast | 31.67 |
| Crispbread, sesame                       | Fermented | Cereals/grains | Bread, toasted                 | Yeast | 20.05 |
| Crispbread, wholemeal                    | Fermented | Cereals/grains | Bread, toasted                 | Yeast | 21.10 |
| Crispbread, wholemeal Cracottes          | Fermented | Cereals/grains | Bread, toasted                 | Yeast | 24.71 |
| Pretzel sticks                           | Fermented | Cereals/grains | Bread, toasted                 | Yeast | 18.76 |
| Toast                                    | Fermented | Cereals/grains | Bread, toasted                 | Yeast | 12.19 |
| Toast, Melba natural                     | Fermented | Cereals/grains | Bread, toasted                 | Yeast | 10.72 |
| Toast, Melba other varieties             | Fermented | Cereals/grains | Bread, toasted                 | Yeast | 21.08 |
| Baguette, white                          | Fermented | Cereals/grains | Bread, white                   | Yeast | 68.90 |
| Bread, Blue Band Goede Start white bread | Fermented | Cereals/grains | Bread, white                   | Yeast | 34.17 |
| Bread, pita white                        | Fermented | Cereals/grains | Bread, white                   | Yeast | 89.48 |
| Bread, Tijger white                      | Fermented | Cereals/grains | Bread, white                   | Yeast | 73.16 |
| Bread, white average milk/water based    | Fermented | Cereals/grains | Bread, white                   | Yeast | 57.64 |
| Bread, white milk based                  | Fermented | Cereals/grains | Bread, white                   | Yeast | 58.29 |
| Bread, white Turkish                     | Fermented | Cereals/grains | Bread, white                   | Yeast | 99.50 |
| Bread, white with sugar Suikerbrood      | Fermented | Cereals/grains | Bread, white                   | Yeast | 57.81 |
| Bread, white with sunflower seeds        | Fermented | Cereals/grains | Bread, white                   | Yeast | 74.25 |
| Bread, white, water based                | Fermented | Cereals/grains | Bread, white                   | Yeast | 62.67 |
| Roll, white, hard                        | Fermented | Cereals/grains | Bread, white                   | Yeast | 76.06 |
| Roll, white, soft                        | Fermented | Cereals/grains | Bread, white                   | Yeast | 62.19 |
| Bread, current, wholemeal                | Fermented | Cereals/grains | Bread, wholegrain or wholemeal | Yeast | 53.81 |

|                                          |           |                |                                  |                |       |
|------------------------------------------|-----------|----------------|----------------------------------|----------------|-------|
| Bread, multigrain, average with seeds    | Fermented | Cereals/grains | Bread, w holegrain or w holemeal | Yeast          | 72.70 |
| Bread, multigrain flour with seeds       | Fermented | Cereals/grains | Bread, w holegrain or w holemeal | Yeast          | 91.33 |
| Bread, multigrain, w holemeal with Becel | Fermented | Cereals/grains | Bread, w holegrain or w holemeal | Yeast          | 67.63 |
| Bread, multigrain, w holemeal with seeds | Fermented | Cereals/grains | Bread, w holegrain or w holemeal | Yeast          | 73.21 |
| Bread, sourdough, w holemeal             | Fermented | Cereals/grains | Bread, w holegrain or w holemeal | Yeast/bacteria | 81.48 |
| Bread, Tijger brown, w heat              | Fermented | Cereals/grains | Bread, w holegrain or w holemeal | Yeast          | 85.37 |
| Bread, w heat rye, w holemeal            | Fermented | Cereals/grains | Bread, w holegrain or w holemeal | Yeast          | 70.00 |
| Bread, w holemeal, average               | Fermented | Cereals/grains | Bread, w holegrain or w holemeal | Yeast          | 70.38 |
| Bread, w holemeal, fine                  | Fermented | Cereals/grains | Bread, w holegrain or w holemeal | Yeast          | 74.45 |
| Bread, w holemeal with nuts              | Fermented | Cereals/grains | Bread, w holegrain or w holemeal | Yeast          | 61.96 |
| Bread, w holemeal with pumpkin seeds     | Fermented | Cereals/grains | Bread, w holegrain or w holemeal | Yeast          | 66.67 |
| Bread w holemeal with seeds              | Fermented | Cereals/grains | Bread, w holegrain or w holemeal | Yeast          | 74.28 |
| Bread w holemeal with sunflower seeds    | Fermented | Cereals/grains | Bread, w holegrain or w holemeal | Yeast          | 79.31 |
| Bread w holemeal with w heat kernels     | Fermented | Cereals/grains | Bread, w holegrain or w holemeal | Yeast          | 74.22 |
| Bun w holemeal with muesli               | Fermented | Cereals/grains | Bread, w holegrain or w holemeal | Yeast          | 67.67 |
| Roll, multigrain, hard                   | Fermented | Cereals/grains | Bread, w holegrain or w holemeal | Yeast          | 72.71 |
| Roll, multigrain, soft                   | Fermented | Cereals/grains | Bread, w holegrain or w holemeal | Yeast          | 56.73 |

|                                             |           |                      |                                |                           |       |
|---------------------------------------------|-----------|----------------------|--------------------------------|---------------------------|-------|
| Roll, wholemeal, soft                       | Fermented | Cereals/grains       | Bread, wholegrain or wholemeal | Yeast                     | 72.14 |
| Dough for pizza and savoury pie             | Fermented | Cereals/grains       | Other                          | Yeast                     | 91.93 |
| Doughnut, Dutch style                       | Fermented | Cereals/grains       | Other                          | Yeast                     | 68.08 |
| Doughnuts, plain                            | Fermented | Cereals/grains       | Other                          | Yeast                     | 49.00 |
| Almond filled pastry                        | Fermented | Cereals/grains       | Pastry                         | Yeast                     | 47.81 |
| Croissant, average                          | Fermented | Cereals/grains       | Pastry                         | Yeast                     | 41.69 |
| Croissant, chocolate                        | Fermented | Cereals/grains       | Pastry                         | Yeast                     | 50.33 |
| Croissant prepared with butter              | Fermented | Cereals/grains       | Pastry                         | Yeast                     | 45.50 |
| Croissant prepared without butter           | Fermented | Cereals/grains       | Pastry                         | Yeast                     | 45.00 |
| Croissant with ham and cheese               | Fermented | Cereals/grains       | Pastry                         | Yeast                     | 65.25 |
| Croissant with cheese                       | Fermented | Cereals/grains       | Pastry                         | Yeast                     | 44.29 |
| Croissants                                  | Fermented | Cereals/grains       | Pastry                         | Yeast                     | 47.61 |
| Danish pastry                               | Fermented | Cereals/grains       | Pastry                         | Yeast                     | 62.95 |
| Waffle (Luikse)                             | Fermented | Cereals/grains       | Pastry                         | Yeast                     | 55.00 |
| Waffle, soft-/sugar-/flash-                 | Fermented | Cereals/grains       | Pastry                         | Yeast                     | 43.25 |
| Chocolate bar milk with nuts                | Fermented | Cocoa-based products | Chocolate                      | Endogenous microorganisms | 28.32 |
| Chocolate bar milk without sugar            | Fermented | Cocoa-based products | Chocolate                      | Endogenous microorganisms | 6.20  |
| Chocolate, confetti, average                | Fermented | Cocoa-based products | Chocolate                      | Endogenous microorganisms | 14.10 |
| Chocolate, confetti, milk                   | Fermented | Cocoa-based products | Chocolate                      | Endogenous microorganisms | 15.01 |
| Chocolate, confetti, mix of white and plain | Fermented | Cocoa-based products | Chocolate                      | Endogenous microorganisms | 14.25 |
| Chocolate, confetti, plain                  | Fermented | Cocoa-based products | Chocolate                      | Endogenous microorganisms | 15.52 |
| Chocolate, confetti, white                  | Fermented | Cocoa-based products | Chocolate                      | Endogenous microorganisms | 11.33 |
| Chocolate flakes, average                   | Fermented | Cocoa-based products | Chocolate                      | Endogenous microorganisms | 14.33 |



|                                             |           |                      |                   |                           |        |
|---------------------------------------------|-----------|----------------------|-------------------|---------------------------|--------|
| Chocolate flakes, milk                      | Fermented | Cocoa-based products | Chocolate         | Endogenous microorganisms | 13.69  |
| Chocolate flakes, plain                     | Fermented | Cocoa-based products | Chocolate         | Endogenous microorganisms | 16.23  |
| Chocolate liqueurs                          | Fermented | Cocoa-based products | Chocolate         | Endogenous microorganisms | 15.15  |
| Chocolate, plain                            | Fermented | Cocoa-based products | Chocolate         | Endogenous microorganisms | 15.24  |
| Chocolate, plain with nuts                  | Fermented | Cocoa-based products | Chocolate         | Endogenous microorganisms | 20.00  |
| Chocolate, plain without sugar              | Fermented | Cocoa-based products | Chocolate         | Endogenous microorganisms | 10.67  |
| Chocolate white                             | Fermented | Cocoa-based products | Chocolate         | Endogenous microorganisms | 17.96  |
| Chocolates, filled/Belguim chocolate        | Fermented | Cocoa-based products | Chocolate         | Endogenous microorganisms | 21.72  |
| Milk chocolate                              | Fermented | Cocoa-based products | Chocolate         | Endogenous microorganisms | 18.33  |
| Milk chocolate with hazelnuts without sugar | Fermented | Cocoa-based products | Chocolate         | Endogenous microorganisms | 48.83  |
| Milk chocolate with puffed rice             | Fermented | Cocoa-based products | Chocolate         | Endogenous microorganisms | 16.50  |
| Cocoa powder                                | Fermented | Cocoa-based products | Chocolate, powder | Endogenous microorganisms | 2.33   |
| Buttermilk                                  | Fermented | Dairy                | Buttermilk        | Bacteria                  | 211.36 |
| Buttermilk with fruit                       | Fermented | Dairy                | Buttermilk        | Bacteria                  | 207.86 |
| Cheese 10+                                  | Fermented | Dairy                | Cheese, hard      | Bacteria                  | 36.00  |
| Cheese 20+                                  | Fermented | Dairy                | Cheese, hard      | Bacteria                  | 20.96  |
| Cheese 20+, Leiden with cumin/Frisian clove | Fermented | Dairy                | Cheese, hard      | Bacteria                  | 32.00  |
| Cheese 20+, rindless                        | Fermented | Dairy                | Cheese, hard      | Bacteria                  | 20.00  |
| Cheese 30+                                  | Fermented | Dairy                | Cheese, hard      | Bacteria                  | 24.45  |
| Cheese 30+, low salt                        | Fermented | Dairy                | Cheese, hard      | Bacteria                  | 21.53  |

|                                             |           |       |                |               |       |
|---------------------------------------------|-----------|-------|----------------|---------------|-------|
| Cheese 40+, Leiden with cumin/Frisian clove | Fermented | Dairy | Cheese, hard   | Bacteria      | 27.63 |
| Cheese 40+, sodium reduced                  | Fermented | Dairy | Cheese, hard   | Bacteria      | 20.67 |
| Cheese 45+                                  | Fermented | Dairy | Cheese, hard   | Bacteria      | 27.68 |
| Cheese 48+, low salt                        | Fermented | Dairy | Cheese, hard   | Bacteria      | 22.80 |
| Cheese 50+                                  | Fermented | Dairy | Cheese, hard   | Bacteria      | 24.36 |
| Cheese, Amsterdam 48+                       | Fermented | Dairy | Cheese, hard   | Bacteria      | 22.94 |
| Cheese, Bluefort                            | Fermented | Dairy | Cheese, hard   | Bacteria      | 33.14 |
| Cheese, Cheddar                             | Fermented | Dairy | Cheese, hard   | Bacteria      | 23.50 |
| Cheese, Edam 40+                            | Fermented | Dairy | Cheese, hard   | Bacteria      | 26.31 |
| Cheese, Emmenthaler                         | Fermented | Dairy | Cheese, hard   | Bacteria      | 29.02 |
| Cheese, goat, hard                          | Fermented | Dairy | Cheese, hard   | Bacteria      | 25.42 |
| Cheese, Gouda 48+, aged 10-12 mths          | Fermented | Dairy | Cheese, hard   | Bacteria      | 27.63 |
| Cheese, Gouda 48+, aged 4-7 mths            | Fermented | Dairy | Cheese, hard   | Bacteria      | 24.71 |
| Cheese, Gouda 48+, aged 4-8 weeks           | Fermented | Dairy | Cheese, hard   | Bacteria      | 25.98 |
| Cheese, Gouda 48+, aged 8 w k-4 mths        | Fermented | Dairy | Cheese, hard   | Bacteria      | 25.16 |
| Cheese, Gouda 48+, average                  | Fermented | Dairy | Cheese, hard   | Bacteria      | 25.49 |
| Cheese, Gruyere                             | Fermented | Dairy | Cheese, hard   | Bacteria      | 31.60 |
| Cheese, Parmesan                            | Fermented | Dairy | Cheese, hard   | Bacteria      | 19.17 |
| Cheese, processed, rindless 40+             | Fermented | Dairy | Cheese, hard   | Bacteria      | 25.06 |
| Cheese product with vegetable fat 45+       | Fermented | Dairy | Cheese, hard   | Bacteria      | 17.00 |
| Cheese, raw milk 48+                        | Fermented | Dairy | Cheese, hard   | Bacteria      | 28.17 |
| Cheese, smoked                              | Fermented | Dairy | Cheese, hard   | Bacteria      | 20.57 |
| Cheese, Sw iss, dried                       | Fermented | Dairy | Cheese, hard   | Bacteria      | 6.29  |
| Cheese, Gorgonzola                          | Fermented | Dairy | Cheese, medium | Bacteria/mold | 43.16 |
| Cheese, Leerdammer/Maasdammer 45+           | Fermented | Dairy | Cheese, medium | Bacteria      | 32.87 |

|                                                     |           |       |                |               |        |
|-----------------------------------------------------|-----------|-------|----------------|---------------|--------|
| Cheese, Roquefort                                   | Fermented | Dairy | Cheese, medium | Bacteria/mold | 27.63  |
| Cheese, Saint Paulin/Port Salut                     | Fermented | Dairy | Cheese, medium | Bacteria      | 40.80  |
| Cheese, Stilton                                     | Fermented | Dairy | Cheese, medium | Bacteria/mold | 28.67  |
| Cheese, Brie 50+                                    | Fermented | Dairy | Cheese, soft   | Bacteria/mold | 22.00  |
| Cheese, Brie 60+                                    | Fermented | Dairy | Cheese, soft   | Bacteria/mold | 30.58  |
| Cheese, Camembert 30+                               | Fermented | Dairy | Cheese, soft   | Bacteria/mold | 12.94  |
| Cheese, Camembert 45+                               | Fermented | Dairy | Cheese, soft   | Bacteria/mold | 53.16  |
| Cheese, goat fresh                                  | Fermented | Dairy | Cheese, soft   | Bacteria      | 33.67  |
| Cheese, Kernhem 60+                                 | Fermented | Dairy | Cheese, soft   | Bacteria      | 38.50  |
| Cheese, Rambol                                      | Fermented | Dairy | Cheese, soft   | Bacteria      | 21.33  |
| Cheese, sheep fresh                                 | Fermented | Dairy | Cheese, soft   | Bacteria      | 36.07  |
| Cream, sour                                         | Fermented | Dairy | Cream          | Bacteria      | 24.50  |
| Creme fraiche                                       | Fermented | Dairy | Cream          | Bacteria      | 24.34  |
| Creme fraiche, half fat                             | Fermented | Dairy | Cream          | Bacteria      | 51.33  |
| Fromage frais, full fat                             | Fermented | Dairy | Quark          | Bacteria      | 109.81 |
| Fromage frais, full fat w ith fruit                 | Fermented | Dairy | Quark          | Bacteria      | 129.00 |
| Fromage frais, half fat                             | Fermented | Dairy | Quark          | Bacteria      | 99.92  |
| Fromage frais, half fat w ith fruit                 | Fermented | Dairy | Quark          | Bacteria      | 121.30 |
| Fromage frais, low fat                              | Fermented | Dairy | Quark          | Bacteria      | 122.80 |
| Fromage frais, low fat w ith fruit w ith sw eetener | Fermented | Dairy | Quark          | Bacteria      | 180.96 |
| Fromage frais, low fat w ith fruit                  | Fermented | Dairy | Quark          | Bacteria      | 130.00 |
| Fromage frais, w ith fruit Danootje                 | Fermented | Dairy | Quark          | Bacteria      | 85.71  |
| Fromage frais, yoghurt w ith fruit                  | Fermented | Dairy | Quark          | Bacteria      | 144.84 |
| Whey drink, light Rivella                           | Fermented | Dairy | Whey drink     | NA            | 194.55 |
| Whey drink, Taksi w ith sugar                       | Fermented | Dairy | Whey drink     | NA            | 185.42 |
| Whey drink, Taksi w ith sugar and sw eetener        | Fermented | Dairy | Whey drink     | NA            | 223.33 |
| Whey drink, Taksi w ith sw eetener                  | Fermented | Dairy | Whey drink     | NA            | 175.00 |
| Yakult                                              | Fermented | Dairy | Yakult         | Bacteria      | 67.27  |

|                                                            |           |       |                        |          |        |
|------------------------------------------------------------|-----------|-------|------------------------|----------|--------|
| Yakult light                                               | Fermented | Dairy | Yakult                 | Bacteria | 65.00  |
| Yoghurt, 0% fat w ith fruit (Activia)                      | Fermented | Dairy | Yoghurt                | Bacteria | 135.58 |
| Yoghurt, creamy- with fruit                                | Fermented | Dairy | Yoghurt                | Bacteria | 118.00 |
| Yoghurt, full fat                                          | Fermented | Dairy | Yoghurt                | Bacteria | 137.26 |
| Yoghurt, full fat, natural (Activia)                       | Fermented | Dairy | Yoghurt                | Bacteria | 143.75 |
| Yoghurt, full fat w ith fruit/muesli (Activia)             | Fermented | Dairy | Yoghurt                | Bacteria | 125.14 |
| Yoghurt, full fat w ith fruit                              | Fermented | Dairy | Yoghurt                | Bacteria | 143.14 |
| Yoghurt, Greek, full fat                                   | Fermented | Dairy | Yoghurt                | Bacteria | 113.26 |
| Yoghurt, half fat                                          | Fermented | Dairy | Yoghurt                | Bacteria | 161.36 |
| Yoghurt, half fat (Vifit naturel)                          | Fermented | Dairy | Yoghurt                | Bacteria | 183.33 |
| Yoghurt, half fat w ith fruit                              | Fermented | Dairy | Yoghurt                | Bacteria | 138.41 |
| Yoghurt, low fat                                           | Fermented | Dairy | Yoghurt                | Bacteria | 154.21 |
| Yoghurt, low fat (Bulgarian)                               | Fermented | Dairy | Yoghurt                | Bacteria | 7.62   |
| Yoghurt, low fat w ith fruit w ith sw Vitalinea            | Fermented | Dairy | Yoghurt                | Bacteria | 164.29 |
| Yoghurt, low fat w ith fruit/van w ith sw eetner (Optimel) | Fermented | Dairy | Yoghurt                | Bacteria | 174.19 |
| Yoghurt, low fat w ith fruit                               | Fermented | Dairy | Yoghurt                | Bacteria | 142.54 |
| Yoghurt, low fat w ith fruit w ith sw eeteners             | Fermented | Dairy | Yoghurt                | Bacteria | 139.67 |
| Yoghurt, vanilla, half fat                                 | Fermented | Dairy | Yoghurt                | Bacteria | 144.37 |
| Yoghurt, w hole milk (Bulgarian)                           | Fermented | Dairy | Yoghurt                | Bacteria | 66.54  |
| Actimel                                                    | Fermented | Dairy | Yoghurt, drink product | Bacteria | 99.22  |
| Actimel light                                              | Fermented | Dairy | Yoghurt, drink product | Bacteria | 112.50 |
| Breakfast drink (Breaker Breakfast)                        | Fermented | Dairy | Yoghurt, drink product | Bacteria | 200.00 |
| Yoghurt drink                                              | Fermented | Dairy | Yoghurt, drink product | Bacteria | 177.42 |

|                                            |           |                   |                        |                           |        |
|--------------------------------------------|-----------|-------------------|------------------------|---------------------------|--------|
| Yoghurt drink (Becel pro-activ)            | Fermented | Dairy             | Yoghurt, drink product | Bacteria                  | 112.17 |
| Yoghurt drink (Fristi)                     | Fermented | Dairy             | Yoghurt, drink product | Bacteria                  | 198.75 |
| Yoghurt drink (Fristi) with sweeteners     | Fermented | Dairy             | Yoghurt, drink product | Bacteria                  | 130.00 |
| Yoghurt drink (Vifit), fruit               | Fermented | Dairy             | Yoghurt, drink product | Bacteria                  | 230.60 |
| Yoghurt drink (Vifit), fruit, light        | Fermented | Dairy             | Yoghurt, drink product | Bacteria                  | 249.29 |
| Yoghurt drink (Vifit), natural             | Fermented | Dairy             | Yoghurt, drink product | Bacteria                  | 175.00 |
| Yoghurt drink with sweeteners (Optimel)    | Fermented | Dairy             | Yoghurt, drink product | Bacteria                  | 207.83 |
| Yoghurt drink with sweeteners              | Fermented | Dairy             | Yoghurt, drink product | Bacteria                  | 181.25 |
| Yoghurt drink (Yomild), fruit              | Fermented | Dairy             | Yoghurt, drink product | Bacteria                  | 222.50 |
| Yoghurt drink (Yomild), naturel            | Fermented | Dairy             | Yoghurt, drink product | Bacteria                  | 156.40 |
| Yoghurt product (Becel pro-activ)          | Fermented | Dairy             | Yoghurt, drink product | Bacteria                  | 166.67 |
| Yoghurt snack (Breaker)                    | Fermented | Dairy             | Yoghurt, drink product | Bacteria                  | 200.00 |
| Vegetables, mixed pickled (Atjar tjampoer) | Fermented | Fruits/Vegetables | Other                  | Bacteria                  | 68.42  |
| Cabbage, sauerkraut, cooked                | Fermented | Fruits/Vegetables | Sauerkraut             | Bacteria                  | 141.94 |
| Cabbage, sauerkraut, raw                   | Fermented | Fruits/Vegetables | Sauerkraut             | Bacteria                  | 60.91  |
| Juice, sauerkraut                          | Fermented | Fruits/Vegetables | Sauerkraut             | Bacteria                  | 220.00 |
| Herring, salted                            | Fermented | Meat/Fish         | Fish                   | Endogenous microorganisms | 101.66 |
| Salami                                     | Fermented | Meat/Fish         | Sausages               | Bacteria                  | 24.82  |

|                                                  |                                                                             |           |            |                     |        |
|--------------------------------------------------|-----------------------------------------------------------------------------|-----------|------------|---------------------|--------|
| Salami sausage, saveloy                          | Fermented                                                                   | Meat/Fish | Sausages   | Bacteria            | 23.81  |
| Salami sausage, saveloy, lean                    | Fermented                                                                   | Meat/Fish | Sausages   | Bacteria            | 32.60  |
| Sausage, Chorizo                                 | Fermented                                                                   | Meat/Fish | Sausages   | Bacteria            | 32.31  |
| Sausage, dry salami, Turkish                     | Fermented                                                                   | Meat/Fish | Sausages   | Bacteria            | 33.75  |
| Yeast extract, Marmite                           | Fermented                                                                   | Other     | Marmite    | Yeast               | 3.56   |
| Vinegar                                          | Fermented                                                                   | Other     | Vinegar    | Bacteria/yeast      | 8.30   |
| Tempah, fermented soya beans                     | Fermented                                                                   | Soya      | Soya       | Mold/Bacteria       | 49.60  |
| Soya sauce, savoury                              | Fermented                                                                   | Soya      | Soya sauce | Mold/Bacteria/Yeast | 14.05  |
| Soya sauce, sweet                                | Fermented                                                                   | Soya      | Soya sauce | Mold/Bacteria/Yeast | 13.98  |
| Soya sauce, sweet, low sodium                    | Fermented                                                                   | Soya      | Soya sauce | Mold/Bacteria/Yeast | 7.00   |
| Kale curly with mashed potatoes and sausage      | Composite dish/contains a fermented ingredient but is not itself fermented. | NA        | NA         | NA                  | 385.00 |
| Fried rice, Nasi goreng, frozen/tinned           | Composite dish/contains a fermented ingredient but is not itself fermented. | NA        | NA         | NA                  | 350.00 |
| Sauerkraut with mashed potatoes without meat     | Composite dish/contains a fermented ingredient but is not itself fermented. | NA        | NA         | NA                  | 342.44 |
| Lasagna with meat and sauce, frozen              | Composite dish/contains a fermented ingredient but is not itself fermented. | NA        | NA         | NA                  | 333.33 |
| Lasagna with meat and sauce, ready-to-eat        | Composite dish/contains a fermented ingredient but is not itself fermented. | NA        | NA         | NA                  | 292.27 |
| Spaghetti Bolognese, frozen                      | Composite dish/contains a fermented ingredient but is not itself fermented. | NA        | NA         | NA                  | 259.00 |
| Porridge, buttermilk with wheat flour            | Composite dish/contains a fermented ingredient but is not itself fermented. | NA        | NA         | NA                  | 255.00 |
| Chinese noodle dish, Bami goreng frozen          | Composite dish/contains a fermented ingredient but is not itself fermented. | NA        | NA         | NA                  | 253.33 |
| Fried rice, Nasi goreng, ready-to-eat            | Composite dish/contains a fermented ingredient but is not itself fermented. | NA        | NA         | NA                  | 235.38 |
| Pizza, salami, frozen, unprepared                | Composite dish/contains a fermented ingredient but is not itself fermented. | NA        | NA         | NA                  | 227.19 |
| Pizza with ham and pineapple, frozen, unprepared | Composite dish/contains a fermented ingredient but is not itself fermented. | NA        | NA         | NA                  | 223.79 |

|                                               |                                                                             |    |    |    |        |
|-----------------------------------------------|-----------------------------------------------------------------------------|----|----|----|--------|
| Chinese noodles, Bami goreng, ready-to-eat    | Composite dish/contains a fermented ingredient but is not itself fermented. | NA | NA | NA | 223.06 |
| Pizza with meat frozen, unprepared            | Composite dish/contains a fermented ingredient but is not itself fermented. | NA | NA | NA | 220.52 |
| Quiche with vegetables/cheese/egg             | Composite dish/contains a fermented ingredient but is not itself fermented. | NA | NA | NA | 219.19 |
| Pizza with cheese and vegetables, frozen      | Composite dish/contains a fermented ingredient but is not itself fermented. | NA | NA | NA | 216.86 |
| Smoothie, fruit with dairy                    | Composite dish/contains a fermented ingredient but is not itself fermented. | NA | NA | NA | 213.33 |
| Pizza with fish, frozen, unprepared           | Composite dish/contains a fermented ingredient but is not itself fermented. | NA | NA | NA | 209.50 |
| Fried rice Nasi goreng with egg               | Composite dish/contains a fermented ingredient but is not itself fermented. | NA | NA | NA | 203.09 |
| Spinach, tinned                               | Processed/tinned but unclear if fermented as well.                          | NA | NA | NA | 200.00 |
| Pizza with frozen meat                        | Composite dish/contains a fermented ingredient but is not itself fermented. | NA | NA | NA | 195.17 |
| Chinese noodle, dish Bami goreng, without egg | Composite dish/contains a fermented ingredient but is not itself fermented. | NA | NA | NA | 186.59 |
| Pizza with cheese and tomato                  | Composite dish/contains a fermented ingredient but is not itself fermented. | NA | NA | NA | 181.23 |
| Pizza with frozen vegetables                  | Composite dish/contains a fermented ingredient but is not itself fermented. | NA | NA | NA | 175.66 |
| Beans, baked in tomato sauce, tinned          | Processed/tinned but unclear if fermented as well.                          | NA | NA | NA | 170.83 |
| Spinach, creamed, frozen, boiled              | Composite dish/contains a fermented ingredient but is not itself fermented. | NA | NA | NA | 167.15 |
| Hot chocolate from vending machine            | Composite dish/contains a fermented ingredient but is not itself fermented. | NA | NA | NA | 165.37 |
| Peas, marrow fat legumes, tinned              | Processed/tinned but unclear if fermented as well.                          | NA | NA | NA | 164.82 |
| Pancake                                       | Composite dish/contains a fermented ingredient but is not itself fermented. | NA | NA | NA | 161.93 |

|                                                 |                                                                             |    |    |    |        |
|-------------------------------------------------|-----------------------------------------------------------------------------|----|----|----|--------|
| Tortellini, boiled                              | Composite dish/contains a fermented ingredient but is not itself fermented. | NA | NA | NA | 158.00 |
| Peas and carrots, tinned                        | Processed/tinned but unclear if fermented as well.                          | NA | NA | NA | 156.53 |
| Peas, garden extra fine, low sodium, tinned     | Processed/tinned but unclear if fermented as well.                          | NA | NA | NA | 150.00 |
| Porridge, buttermilk groats                     | Composite dish/contains a fermented ingredient but is not itself fermented. | NA | NA | NA | 148.33 |
| Tart with bread base with veg/egg/cheese        | Composite dish/contains a fermented ingredient but is not itself fermented. | NA | NA | NA | 141.08 |
| Carrots, tinned                                 | Processed/tinned but unclear if fermented as well.                          | NA | NA | NA | 135.92 |
| Ragout with meat, all types                     | Composite dish/contains a fermented ingredient but is not itself fermented. | NA | NA | NA | 132.00 |
| Beans, brown, tinned                            | Processed/tinned but unclear if fermented as well.                          | NA | NA | NA | 130.72 |
| Pizza with cross-bottom, frozen                 | Composite dish/contains a fermented ingredient but is not itself fermented. | NA | NA | NA | 125.00 |
| Mackerel in oil, tinned                         | Processed/tinned but unclear if fermented as well.                          | NA | NA | NA | 125.00 |
| Beetroot, pickled, glass                        | Pickled (probably with vinegar) but unclear if fermented.                   | NA | NA | NA | 123.75 |
| Dessert made of custard, yoghurt & syrup        | Composite dish/contains a fermented ingredient but is not itself fermented. | NA | NA | NA | 121.78 |
| Tomatoes, tinned                                | Processed/tinned but unclear if fermented as well.                          | NA | NA | NA | 121.52 |
| Pork, Chinese style, Babi pangang, without rice | Composite dish/contains a fermented ingredient but is not itself fermented. | NA | NA | NA | 121.03 |
| Cabbage, red, glass                             | Processed/tinned but unclear if fermented as well.                          | NA | NA | NA | 120.55 |
| Macaroni with ham & cheese sauce, tinned        | Composite dish/contains a fermented ingredient but is not itself fermented. | NA | NA | NA | 120.00 |
| Straw berry puree, tinned                       | Processed/tinned but unclear if fermented as well.                          | NA | NA | NA | 120.00 |



|                                             |                                                                             |    |    |    |        |
|---------------------------------------------|-----------------------------------------------------------------------------|----|----|----|--------|
| Beans, French, tinned                       | Processed/tinned but unclear if fermented as well.                          | NA | NA | NA | 117.06 |
| Peas, garden, medium fine, tinned           | Processed/tinned but unclear if fermented as well.                          | NA | NA | NA | 116.84 |
| Croquettes, potato, frozen, unprepared      | Composite dish/contains a fermented ingredient but is not itself fermented. | NA | NA | NA | 115.75 |
| Pears in syrup, tinned                      | Processed/tinned but unclear if fermented as well.                          | NA | NA | NA | 113.39 |
| Herring fillet in tomato sauce, tinned      | Processed/tinned but unclear if fermented as well.                          | NA | NA | NA | 110.67 |
| Herring, smoked                             | Processed/tinned but unclear if fermented as well.                          | NA | NA | NA | 110.00 |
| Cheesecake made with fromage frais          | Composite dish/contains a fermented ingredient but is not itself fermented. | NA | NA | NA | 108.66 |
| Pea, garden super fine, tinned              | Processed/tinned but unclear if fermented as well.                          | NA | NA | NA | 108.00 |
| Beans, broad, tinned                        | Processed/tinned but unclear if fermented as well.                          | NA | NA | NA | 104.00 |
| Raisins coated with milk chocolate          | Composite dish/contains a fermented ingredient but is not itself fermented. | NA | NA | NA | 100.67 |
| Apple sauce, tinned                         | Processed/tinned but unclear if fermented as well.                          | NA | NA | NA | 99.93  |
| Chocolate pudding with sauce                | Composite dish/contains a fermented ingredient but is not itself fermented. | NA | NA | NA | 98.33  |
| Salad, Russian                              | Composite dish/contains a fermented ingredient but is not itself fermented. | NA | NA | NA | 89.99  |
| Chop-suey, Indonesian, without rice         | Composite dish/contains a fermented ingredient but is not itself fermented. | NA | NA | NA | 89.93  |
| Tangerines in syrup, tinned                 | Processed/tinned but unclear if fermented as well.                          | NA | NA | NA | 89.54  |
| Herring, pickled with gherkin               | Composite dish/contains a fermented ingredient but is not itself fermented. | NA | NA | NA | 87.33  |
| Snack sausage roll with bread, dough pastry | Composite dish/contains a fermented ingredient but is not itself fermented. | NA | NA | NA | 84.00  |

|                                           |                                                                             |    |    |    |       |
|-------------------------------------------|-----------------------------------------------------------------------------|----|----|----|-------|
| Peaches in syrup, tinned                  | Processed/tinned but unclear if fermented as well.                          | NA | NA | NA | 83.72 |
| Apricots in syrup, tinned                 | Processed/tinned but unclear if fermented as well.                          | NA | NA | NA | 80.00 |
| Plums in syrup, tinned                    | Processed/tinned but unclear if fermented as well.                          | NA | NA | NA | 80.00 |
| Apple sauce without sugar, tinned         | Processed/tinned but unclear if fermented as well.                          | NA | NA | NA | 78.16 |
| Herring, pickled (sweet and sour)         | Composite dish/contains a fermented ingredient but is not itself fermented. | NA | NA | NA | 77.85 |
| Fruit cocktail in syrup, tinned           | Processed/tinned but unclear if fermented as well.                          | NA | NA | NA | 76.58 |
| Foe jung hai, filled omelette             | Composite dish/contains a fermented ingredient but is not itself fermented. | NA | NA | NA | 73.84 |
| Salmon, tinned                            | Processed/tinned but unclear if fermented as well.                          | NA | NA | NA | 72.69 |
| Mussels, pickled                          | Composite dish/contains a fermented ingredient but is not itself fermented. | NA | NA | NA | 72.33 |
| Gammon, boiled, deboned                   | Processed/tinned but unclear if fermented as well.                          | NA | NA | NA | 71.81 |
| Sauce, warm liquid, ready-made (<12% fat) | Composite dish/contains a fermented ingredient but is not itself fermented. | NA | NA | NA | 71.62 |
| Chocolate eclair                          | Composite dish/contains a fermented ingredient but is not itself fermented. | NA | NA | NA | 70.00 |
| Mushrooms, tinned                         | Processed/tinned but unclear if fermented as well.                          | NA | NA | NA | 69.75 |
| Cucumber, sliced, pickled                 | Pickled (probably with vinegar) but unclear if fermented.                   | NA | NA | NA | 68.50 |
| Tuna in oil, tinned                       | Processed/tinned but unclear if fermented as well.                          | NA | NA | NA | 68.15 |
| Sardines/pilchards in oil, tinned         | Processed/tinned but unclear if fermented as well.                          | NA | NA | NA | 66.75 |
| Mackerel in water, tinned                 | Processed/tinned but unclear if fermented as well.                          | NA | NA | NA | 65.96 |

|                                              |                                                                             |    |    |    |       |
|----------------------------------------------|-----------------------------------------------------------------------------|----|----|----|-------|
| Flan filling, tinned                         | Processed/tinned but unclear if fermented as well.                          | NA | NA | NA | 65.00 |
| Asparagus, tinned                            | Processed/tinned but unclear if fermented as well.                          | NA | NA | NA | 63.50 |
| Teacakes, chocolate-coated marshmallow       | Composite dish/contains a fermented ingredient but is not itself fermented. | NA | NA | NA | 63.00 |
| Roti Surinam pancake                         | Composite dish/contains a fermented ingredient but is not itself fermented. | NA | NA | NA | 62.00 |
| Tuna in water, tinned                        | Processed/tinned but unclear if fermented as well.                          | NA | NA | NA | 61.82 |
| Cherries in syrup, tinned                    | Processed/tinned but unclear if fermented as well.                          | NA | NA | NA | 59.56 |
| Snack sausage roll with bread dough frozen   | Composite dish/contains a fermented ingredient but is not itself fermented. | NA | NA | NA | 56.50 |
| Sauce, cheese                                | Processed cheese.                                                           | NA | NA | NA | 56.04 |
| Biscuits, fortified (Fruitkick Extra)        | Unclear if yeast or another leavening agent is used.                        | NA | NA | NA | 54.00 |
| Advocaat liqueur                             | Composite dish/contains a fermented ingredient but is not itself fermented. | NA | NA | NA | 53.41 |
| Biscuits, spiced Speculaas with almond paste | Unclear if yeast or another leavening agent is used.                        | NA | NA | NA | 51.46 |
| Sauce, w arm liquid, ready-made (>12% fat)   | Composite dish/contains a fermented ingredient but is not itself fermented. | NA | NA | NA | 50.50 |
| Processed meat product, low sodium, average  | Unclear if processing is fermentation or another method.                    | NA | NA | NA | 50.00 |
| Sauce, oriental, ready-made in jar/bag       | Composite dish/contains a fermented ingredient but is not itself fermented. | NA | NA | NA | 47.67 |
| Pineapple in syrup, tinned                   | Processed/tinned but unclear if fermented as well.                          | NA | NA | NA | 47.58 |
| Cake wrapped in marzipan and chocolate       | Composite dish/contains a fermented ingredient but is not itself fermented. | NA | NA | NA | 46.23 |
| Luncheon meat, tinned                        | Processed/tinned but unclear if fermented as well.                          | NA | NA | NA | 46.00 |
| Muesli, crunchy with chocolate               | Composite dish/contains a fermented ingredient but is not itself fermented. | NA | NA | NA | 44.80 |

|                                                    |                                                                             |    |    |    |       |
|----------------------------------------------------|-----------------------------------------------------------------------------|----|----|----|-------|
| Eel, smoked                                        | Processed/tinned but unclear if fermented as well.                          | NA | NA | NA | 44.00 |
| Sweet pepper, sweet/sour, pickled                  | Pickled (probably with vinegar) but unclear if fermented.                   | NA | NA | NA | 43.55 |
| Pastry puff cheese, filled, unprepared             | Composite dish/contains a fermented ingredient but is not itself fermented. | NA | NA | NA | 43.54 |
| Mango chutney                                      | Composite dish/contains a fermented ingredient but is not itself fermented. | NA | NA | NA | 42.00 |
| Biscuits, oatmeal                                  | Unclear if yeast or another leavening agent is used.                        | NA | NA | NA | 41.17 |
| Fruit in syrup, tinned                             | Processed/tinned but unclear if fermented as well.                          | NA | NA | NA | 40.07 |
| Biscuits fortified with currants (LigaEvergreen)   | Unclear if yeast or another leavening agent is used.                        | NA | NA | NA | 38.63 |
| Sauce Chinese, sweet & sour, home-made preparation | Composite dish/contains a fermented ingredient but is not itself fermented. | NA | NA | NA | 38.34 |
| Biscuits, Jaffa cakes/Cake (PM's)                  | Unclear if yeast or another leavening agent is used.                        | NA | NA | NA | 38.00 |
| Cake, chocolate made with butter                   | Composite dish/contains a fermented ingredient but is not itself fermented. | NA | NA | NA | 37.88 |
| Biscuits, fortified (Liga Milkbreak)               | Unclear if yeast or another leavening agent is used.                        | NA | NA | NA | 37.50 |
| M&M's, chocolate with peanuts                      | Composite dish/contains a fermented ingredient but is not itself fermented. | NA | NA | NA | 37.43 |
| Raspberry/red currant puree, tinned                | Processed/tinned but unclear if fermented as well.                          | NA | NA | NA | 36.67 |
| Sausage excluding liver, average                   | Unclear if fermented.                                                       | NA | NA | NA | 34.89 |
| Bamboo shoots, tinned                              | Processed/tinned but unclear if fermented as well.                          | NA | NA | NA | 34.63 |
| Biscuits, fruit                                    | Unclear if yeast or another leavening agent is used.                        | NA | NA | NA | 33.67 |
| Candybar, KitKat                                   | Composite dish/contains a fermented ingredient but is not itself fermented. | NA | NA | NA | 33.35 |
| Biscuits, fortified (Liga Evergreen? assortment)   | Unclear if yeast or another leavening agent is used.                        | NA | NA | NA | 31.92 |

|                                               |                                                                             |    |    |    |       |
|-----------------------------------------------|-----------------------------------------------------------------------------|----|----|----|-------|
| Tomatoes dried in oil tin/glass               | Processed/tinned but unclear if fermented as well.                          | NA | NA | NA | 31.90 |
| Candybar, Twix                                | Composite dish/contains a fermented ingredient but is not itself fermented. | NA | NA | NA | 31.73 |
| Sausage raw beef (ossenworst)                 | Unclear if fermented.                                                       | NA | NA | NA | 31.33 |
| Candybar, Snickers                            | Composite dish/contains a fermented ingredient but is not itself fermented. | NA | NA | NA | 30.62 |
| Gherkins, sweet, pickled                      | Pickled (probably with vinegar) but unclear if fermented.                   | NA | NA | NA | 30.28 |
| Candybar, Bounty                              | Composite dish/contains a fermented ingredient but is not itself fermented. | NA | NA | NA | 29.67 |
| Cake made with butter                         | Composite dish/contains a fermented ingredient but is not itself fermented. | NA | NA | NA | 29.63 |
| Cake, butter, Dutch (Boterkoek)               | Composite dish/contains a fermented ingredient but is not itself fermented. | NA | NA | NA | 29.42 |
| Sauce, barbecue                               | Composite dish/contains a fermented ingredient but is not itself fermented. | NA | NA | NA | 29.41 |
| Eclair, cheese cream filled                   | Composite dish/contains a fermented ingredient but is not itself fermented. | NA | NA | NA | 29.33 |
| Sauce (Joppie)                                | Composite dish/contains a fermented ingredient but is not itself fermented. | NA | NA | NA | 28.75 |
| Herb paste (boemboe)                          | Composite dish/contains a fermented ingredient but is not itself fermented. | NA | NA | NA | 27.74 |
| Biscuits, chocolate-coated (Chocoprins)       | Unclear if yeast or another leavening agent is used.                        | NA | NA | NA | 27.16 |
| Beef, salted, cooked                          | Processed/tinned but unclear if fermented as well.                          | NA | NA | NA | 27.00 |
| Sauce for chips (35% oil)                     | Composite dish/contains a fermented ingredient but is not itself fermented. | NA | NA | NA | 26.73 |
| Biscuits with dried fruit & yoghurt (Yofruit) | Unclear if yeast or another leavening agent is used.                        | NA | NA | NA | 25.89 |
| Tomato puree, concentrated, tinned            | Processed/tinned but unclear if fermented as well.                          | NA | NA | NA | 25.85 |
| Biscuits, filled (Prince)                     | Unclear if yeast or another leavening agent is used.                        | NA | NA | NA | 25.75 |

|                                                  |                                                                             |    |    |    |       |
|--------------------------------------------------|-----------------------------------------------------------------------------|----|----|----|-------|
| Biscuits & snacks, cheesy, average               | Unclear if yeast or another leavening agent is used.                        | NA | NA | NA | 25.36 |
| Bacon rashers, streaky                           | Processed/tinned but unclear if fermented as well.                          | NA | NA | NA | 25.18 |
| Ketchup, curry                                   | Composite dish/contains a fermented ingredient but is not itself fermented. | NA | NA | NA | 25.16 |
| Onions, silverskin, sweet, pickled without sugar | Pickled (probably with vinegar) but unclear if fermented.                   | NA | NA | NA | 25.00 |
| Syrup from tinned fruit                          | Processed/tinned but unclear if fermented as well.                          | NA | NA | NA | 24.75 |
| Gherkins, sour, pickled                          | Pickled (probably with vinegar) but unclear if fermented.                   | NA | NA | NA | 24.69 |
| Cheese spread 60+ (Kiri)                         | Processed cheese.                                                           | NA | NA | NA | 24.50 |
| Ketchup, tomato                                  | Composite dish/contains a fermented ingredient but is not itself fermented. | NA | NA | NA | 24.38 |
| Sauce, cocktail/party/table (>25% oil)           | Composite dish/contains a fermented ingredient but is not itself fermented. | NA | NA | NA | 23.93 |
| Biscuits, fortified (Liga Fruitkick)             | Unclear if yeast or another leavening agent is used.                        | NA | NA | NA | 23.50 |
| Olives, tinned/glass                             | Pickled (probably with vinegar) but unclear if fermented.                   | NA | NA | NA | 23.44 |
| Salad dressing (20% oil with yogurt)             | Composite dish/contains a fermented ingredient but is not itself fermented. | NA | NA | NA | 23.38 |
| Biscuits, salted, average                        | Unclear if yeast or another leavening agent is used.                        | NA | NA | NA | 23.15 |
| Cheese spread 45+                                | Processed cheese.                                                           | NA | NA | NA | 23.00 |
| Dairy spread, plain/herbs light                  | Processed cheese.                                                           | NA | NA | NA | 22.98 |
| Sausage including liver products, average        | Unclear if fermented.                                                       | NA | NA | NA | 22.80 |
| Muesli bar with chocolate                        | Composite dish/contains a fermented ingredient but is not itself fermented. | NA | NA | NA | 22.80 |
| Bilberries in syrup tinned                       | Processed/tinned but unclear if fermented as well.                          | NA | NA | NA | 22.33 |

|                                              |                                                                             |    |    |    |       |
|----------------------------------------------|-----------------------------------------------------------------------------|----|----|----|-------|
| Salad dressing/sauce, approximately 13% oil  | Composite dish/contains a fermented ingredient but is not itself fermented. | NA | NA | NA | 22.26 |
| Sauce, chocolate, for pudding                | Composite dish/contains a fermented ingredient but is not itself fermented. | NA | NA | NA | 21.58 |
| Liver paté                                   | Processed/tinned but unclear if fermented as well.                          | NA | NA | NA | 21.55 |
| Cheese spread 40+                            | Processed cheese.                                                           | NA | NA | NA | 21.50 |
| Biscuits, Dutch, shortbread (sprintsstukken) | Unclear if yeast or another leavening agent is used.                        | NA | NA | NA | 21.37 |
| Salad cream (25% oil)                        | Composite dish/contains a fermented ingredient but is not itself fermented. | NA | NA | NA | 21.26 |
| Biscuits, muesli                             | Unclear if yeast or another leavening agent is used.                        | NA | NA | NA | 21.13 |
| Salad dressing, honey/mustard                | Composite dish/contains a fermented ingredient but is not itself fermented. | NA | NA | NA | 20.64 |
| Paté, averag                                 | Processed/tinned but unclear if fermented as well.                          | NA | NA | NA | 20.50 |
| Cheese spread 30+                            | Processed cheese.                                                           | NA | NA | NA | 20.17 |
| Sauce, cocktail/party/table (25% oil)        | Composite dish/contains a fermented ingredient but is not itself fermented. | NA | NA | NA | 19.94 |
| Mayonnaise, low fat (40% oil)                | Composite dish/contains a fermented ingredient but is not itself fermented. | NA | NA | NA | 19.86 |
| Biscuits, brown/w holemeal                   | Unclear if yeast or another leavening agent is used.                        | NA | NA | NA | 19.66 |
| Biscuits with chocolate layer (Scholiertje)  | Unclear if yeast or another leavening agent is used.                        | NA | NA | NA | 19.50 |
| Capers                                       | Pickled (probably with vinegar) but unclear if fermented.                   | NA | NA | NA | 18.85 |
| Ham, smoked, raw                             | Unclear if fermented.                                                       | NA | NA | NA | 18.81 |
| Sauce for chips (25% oil)                    | Composite dish/contains a fermented ingredient but is not itself fermented. | NA | NA | NA | 18.77 |
| Cocoa powder, sweetened (Nesquik Plus)       | Composite dish/contains a fermented ingredient but is not itself fermented. | NA | NA | NA | 18.50 |

|                                            |                                                                             |    |    |    |       |
|--------------------------------------------|-----------------------------------------------------------------------------|----|----|----|-------|
| Biscuits, sugar free                       | Unclear if yeast or another leavening agent is used.                        | NA | NA | NA | 18.43 |
| Dairy spread, plain/herbs                  | Processed cheese.                                                           | NA | NA | NA | 18.33 |
| Chocolate chip cookie                      | Composite dish/contains a fermented ingredient but is not itself fermented. | NA | NA | NA | 18.31 |
| Cheese spread 48+                          | Processed cheese.                                                           | NA | NA | NA | 18.31 |
| Spread, chocolate hazelnut                 | Composite dish/contains a fermented ingredient but is not itself fermented. | NA | NA | NA | 18.28 |
| Corned beef                                | Processed/tinned but unclear if fermented as well.                          | NA | NA | NA | 18.27 |
| Cheese spread 20+                          | Processed cheese.                                                           | NA | NA | NA | 18.10 |
| Biscuits, chocolate                        | Unclear if yeast or another leavening agent is used.                        | NA | NA | NA | 17.98 |
| Sausage luncheon meat (boterham worst)     | Unclear if fermented.                                                       | NA | NA | NA | 17.70 |
| M&M's chocolate                            | Composite dish/contains a fermented ingredient but is not itself fermented. | NA | NA | NA | 17.69 |
| Tapenade olive                             | Pickled (probably with vinegar) but unclear if fermented.                   | NA | NA | NA | 17.55 |
| Salad dressing (40% oil) (Becel)           | Composite dish/contains a fermented ingredient but is not itself fermented. | NA | NA | NA | 17.40 |
| Mayonnaise, yoghurt-based (25% oil)        | Composite dish/contains a fermented ingredient but is not itself fermented. | NA | NA | NA | 17.32 |
| Mayonnaise                                 | Composite dish/contains a fermented ingredient but is not itself fermented. | NA | NA | NA | 17.30 |
| Biscuits, digestive with chocolate         | Unclear if yeast or another leavening agent is used.                        | NA | NA | NA | 17.00 |
| Spread, chocolate, milk                    | Composite dish/contains a fermented ingredient but is not itself fermented. | NA | NA | NA | 16.94 |
| Processed meat products, 10-20 g fat/100 g | Unclear if processing is fermentation or another method.                    | NA | NA | NA | 16.93 |
| Processed meat products, average           | Processed/tinned but unclear if fermented as well.                          | NA | NA | NA | 16.67 |



|                                             |                                                                             |    |    |    |       |
|---------------------------------------------|-----------------------------------------------------------------------------|----|----|----|-------|
| Biscuits, Dutch (krakeling)                 | Unclear if yeast or another leavening agent is used.                        | NA | NA | NA | 16.52 |
| Biscuits, spiced (Speculaas)                | Unclear if yeast or another leavening agent is used.                        | NA | NA | NA | 16.38 |
| Melon in syrup, canned                      | Processed/tinned but unclear if fermented as well.                          | NA | NA | NA | 16.00 |
| Spread, chocolate, plain                    | Composite dish/contains a fermented ingredient but is not itself fermented. | NA | NA | NA | 15.95 |
| Biscuits, shortbread, Bastogne              | Unclear if yeast or another leavening agent is used.                        | NA | NA | NA | 15.88 |
| Salad dressing / vinaigrette                | Composite dish/contains a fermented ingredient but is not itself fermented. | NA | NA | NA | 15.82 |
| Biscuits, fortified (Liga Continue vitamin) | Unclear if yeast or another leavening agent is used.                        | NA | NA | NA | 15.75 |
| Spread, chocolate (Duo Penotti hazelnut)    | Composite dish/contains a fermented ingredient but is not itself fermented. | NA | NA | NA | 15.35 |
| Beans, runner, tinned                       | Processed/tinned but unclear if fermented as well.                          | NA | NA | NA | 15.00 |
| Processed meat products (>30 g fat/ 100g)   | Unclear if processing is fermentation or another method.                    | NA | NA | NA | 15.00 |
| Processed meat products (20-30 g fat/100g)  | Unclear if processing is fermentation or another method.                    | NA | NA | NA | 15.00 |
| Syrup, malt barley                          | Fermentation ingredient but not fermented itself.                           | NA | NA | NA | 15.00 |
| Spread, duo with chocolate                  | Composite dish/contains a fermented ingredient but is not itself fermented. | NA | NA | NA | 14.79 |
| Piccailly (South Asian pickles product)     | Composite dish/contains a fermented ingredient but is not itself fermented. | NA | NA | NA | 14.75 |
| Forcemeat balls for soup, canned            | Processed/tinned but unclear if fermented as well.                          | NA | NA | NA | 14.50 |
| Brawn, pork pickled in vinegar              | Composite dish/contains a fermented ingredient but is not itself fermented. | NA | NA | NA | 14.35 |
| Biscuits, sponge fingers                    | Unclear if yeast or another leavening agent is used.                        | NA | NA | NA | 14.33 |
| Cocoa powder, sweetened (Benco)             | Composite dish/contains a fermented ingredient but is not itself fermented. | NA | NA | NA | 14.25 |

|                                            |                                                                             |    |    |    |       |
|--------------------------------------------|-----------------------------------------------------------------------------|----|----|----|-------|
| Candybar, Milky Way                        | Composite dish/contains a fermented ingredient but is not itself fermented. | NA | NA | NA | 14.20 |
| Cocoa product, powder (Ovomaltine)         | Composite dish/contains a fermented ingredient but is not itself fermented. | NA | NA | NA | 14.00 |
| Maltesers                                  | Composite dish/contains a fermented ingredient but is not itself fermented. | NA | NA | NA | 14.00 |
| Biscuits, assorted with butter             | Unclear if yeast or another leavening agent is used.                        | NA | NA | NA | 13.85 |
| Pork side, cured and smoked (casselerrib)  | Unclear if fermented.                                                       | NA | NA | NA | 13.83 |
| Salad dressing, naturel, without oil       | Composite dish/contains a fermented ingredient but is not itself fermented. | NA | NA | NA | 13.78 |
| Biscuits, average                          | Unclear if yeast or another leavening agent is used.                        | NA | NA | NA | 13.74 |
| Anchovy in oil, canned                     | Processed/tinned but unclear if fermented as well.                          | NA | NA | NA | 13.57 |
| Toffee with chocolate                      | Composite dish/contains a fermented ingredient but is not itself fermented. | NA | NA | NA | 13.29 |
| Crab in water, tinned                      | Processed/tinned but unclear if fermented as well.                          | NA | NA | NA | 12.94 |
| Chocolate spread, white                    | Composite dish/contains a fermented ingredient but is not itself fermented. | NA | NA | NA | 12.50 |
| Mayonnaise product (approximately 35% oil) | Composite dish/contains a fermented ingredient but is not itself fermented. | NA | NA | NA | 12.20 |
| Beef, smoke-dried                          | Unclear if fermented.                                                       | NA | NA | NA | 12.18 |
| Silver-skin onions, sweet, pickled, glass  | Pickled (probably with vinegar) but unclear if fermented.                   | NA | NA | NA | 11.92 |
| Biscuits, sweet                            | Unclear if yeast or another leavening agent is used.                        | NA | NA | NA | 11.68 |
| After eight chocolate mints                | Composite dish/contains a fermented ingredient but is not itself fermented. | NA | NA | NA | 11.25 |
| Biscuits, gluten-free (Glutafin)           | Unclear if yeast or another leavening agent is used.                        | NA | NA | NA | 11.00 |
| Ginger stem in syrup, tinned               | Processed/tinned but unclear if fermented as well.                          | NA | NA | NA | 9.00  |

|                              |                                                                             |    |    |    |      |
|------------------------------|-----------------------------------------------------------------------------|----|----|----|------|
| Ketchup, spicy               | Composite dish/contains a fermented ingredient but is not itself fermented. | NA | NA | NA | 8.79 |
| Biscuits, Dutch (Frou frou)  | Unclear if yeast or another leavening agent is used.                        | NA | NA | NA | 8.21 |
| Mustard                      | Composite dish/contains a fermented ingredient but is not itself fermented. | NA | NA | NA | 7.43 |
| Pepper, red hot paste        | Composite dish/contains a fermented ingredient but is not itself fermented. | NA | NA | NA | 4.49 |
| Pepper, red hot, fried paste | Composite dish/contains a fermented ingredient but is not itself fermented. | NA | NA | NA | 2.00 |

NA = not applicable

<sup>a</sup> Ordered by fermentation status, food group, then subgroup. The following items are included in this table: foods with a fermentation status of “fermented”, composite dishes containing a fermented ingredient, and foods with unclear fermentation status. Other food items in the FFQ or 24-h recall that were clearly not fermented are not included in this table.

<sup>b</sup> Cheeses could be classified as skim, semi-skim, and full-fat based on the guidelines set by the Dutch Dairy Commodities Act (Overheid.nl. Warenwetbesluit Zuivel). Cheeses with designations of 45+ to 60+ were considered to be full-fat, 10+ to 40+ semi-skim, and ≤10 skim.
