# Supplementary material for: Prevalence of fermented foods in the Dutch adult diet and validation of a food frequency questionnaire for estimating their intake in the NQplus cohort
Source: PubMed Central journal article supplement (PMC7712622; doi:10.1186/s40795-020-00394-z), 2020-12-03
Supplement: 40795_2020_394_MOESM2_ESM.pdf [file 40795_2020_394_MOESM2_ESM.pdf]

**Table S2 Mean Individual Percent Difference and Test Statistics from Bland-Altman Analyses for the Validation Sample (n=809)<sup>a</sup>**

|                                 | %Difference in individual means <sup>b</sup> | Bland-Altman Analyses |       |                         |            |       |                    |
|---------------------------------|----------------------------------------------|-----------------------|-------|-------------------------|------------|-------|--------------------|
|                                 |                                              | Mean Difference       |       |                         | Regression |       |                    |
|                                 |                                              | FFQ - Recall          | SD    | P <sub>difference</sub> | Intercept  | Slope | P <sub>slope</sub> |
| Fermented beverages, g/day      | 17.1                                         | -4.1                  | 250.0 | 0.644                   | -12.9      | 0.01  | 0.558              |
| Coffee, g/day                   | 19.5                                         | 9.3                   | 220.8 | 0.231                   | -17.7      | 0.1   | 0.035              |
| Beer, g/day                     | -73.9                                        | -2.9                  | 120.4 | 0.501                   | 3.7        | -0.1  | 0.004              |
| Wine, g/day                     | 0.3                                          | -10.3                 | 68.1  | <0.0001                 | -0.5       | -0.1  | <0.0001            |
| Fermented cereals/grains, g/day | 0.02                                         | -13.9                 | 45.0  | <0.0001                 | -11.9      | -0.01 | 0.668              |
| Brown bread, g/day              | 50.9                                         | -0.6                  | 38.3  | 0.633                   | -3.6       | 0.1   | 0.010              |
| White bread, g/day              | -151.2                                       | -9.9                  | 27.4  | <0.0001                 | 1.6        | -0.8  | <0.0001            |
| Wholegrain bread, g/day         | -28.0                                        | 3.0                   | 50.5  | 0.090                   | 8.8        | -0.1  | 0.053              |
| Rye bread, g/day                | 196.8                                        | 0.2                   | 11.4  | 0.693                   | 1.1        | -0.3  | <0.0001            |
| Other bread, g/day              | 556.0                                        | 0.8                   | 19.8  | 0.229                   | 2.0        | -0.1  | 0.029              |
| Pastries, g/day                 | -20.0                                        | -0.4                  | 6.1   | 0.098                   | 0.8        | -0.6  | <0.0001            |
| Chocolate, g/day                | 67.8                                         | -3.4                  | 10.6  | <0.0001                 | -0.2       | -0.4  | <0.0001            |
| Fermented dairy, g/day          | 55.0                                         | -4.9                  | 104.0 | 0.182                   | 2.4        | -0.04 | 0.182              |
| Cheese, g/day                   | 134.8                                        | -0.1                  | 24.7  | 0.921                   | -9.3       | 0.3   | <0.0001            |
| Yoghurts, g/day                 | 186.6                                        | 11.9                  | 89.7  | <0.0001                 | 11.7       | 0.00  | 0.941              |
| Quark, g/day                    | -33.1                                        | -10.9                 | 33.9  | <0.0001                 | -2.2       | -1.0  | <0.0001            |
| Buttermilk, g/day               | 15756.6                                      | 41.9                  | 74.6  | <0.0001                 | 0.9        | 1.9   | <0.0001            |
| Non-fermented dairy, g/day      | 106.6                                        | 15.9                  | 113.3 | <0.0001                 | 11.1       | 0.03  | 0.311              |
| Butter, g/day                   | -18.7                                        | 0.02                  | 6.1   | 0.921                   | -0.9       | 0.3   | <0.0001            |
| Cream, g/day                    | 72.6                                         | -4.9                  | 12.9  | <0.0001                 | -0.2       | -0.9  | <0.0001            |
| Ice cream, g/day                | -7.0                                         | -1.7                  | 14.7  | 0.001                   | 3.2        | -0.7  | <0.0001            |
| Milk, g/day                     | 65.3                                         | 25.1                  | 112.8 | <0.0001                 | 20.2       | 0.04  | 0.246              |
| Non-fermented soya, g/day       | 209.7                                        | -1.8                  | 34.6  | 0.143                   | 1.9        | -0.4  | <0.0001            |

FFQ, food frequency questionnaire; SD, standard deviation.

<sup>a</sup> Bland-Altman analyses were performed using the mean energy-adjusted intake values for each food group.

<sup>b</sup> Percent difference is calculated using [(FFQ - Recall)/Recall] x 100% for each individual and subsequently averaged for the entire group.
