# Supplementary material for: Prevalence of fermented foods in the Dutch adult diet and validation of a food frequency questionnaire for estimating their intake in the NQplus cohort
Source: PubMed Central journal article supplement (PMC7712622; doi:10.1186/s40795-020-00394-z), 2020-12-03
Supplement: 40795_2020_394_MOESM3_ESM.pdf [file 40795_2020_394_MOESM3_ESM.pdf]

**Table S3 Attenuation Factors for the Reference 24-hour Recall Compared to the Food Frequency Questionnaire**

| Food Group               | Attenuation Factors ( $\lambda x$ ) <sup>a</sup> |      |      |      |      |      |      |                        |      |      |      |      |      |      |
|--------------------------|--------------------------------------------------|------|------|------|------|------|------|------------------------|------|------|------|------|------|------|
|                          | Crude                                            |      |      |      |      |      |      | Energy-Adjusted        |      |      |      |      |      |      |
|                          | Number of 24-h Recalls                           |      |      |      |      |      |      | Number of 24-h Recalls |      |      |      |      |      |      |
|                          | 2                                                | 3    | 4    | 5    | 6    | 7    | 8    | 2                      | 3    | 4    | 5    | 6    | 7    | 8    |
| Fermented beverages      | 0.83                                             | 0.88 | 0.91 | 0.93 | 0.94 | 0.95 | 0.96 | 0.81                   | 0.87 | 0.9  | 0.92 | 0.93 | 0.94 | 0.95 |
| Coffee                   | 0.86                                             | 0.91 | 0.93 | 0.95 | 0.96 | 0.96 | 0.97 | 0.85                   | 0.90 | 0.92 | 0.94 | 0.95 | 0.96 | 0.96 |
| Beer                     | 0.71                                             | 0.82 | 0.89 | 0.93 | 0.96 | 0.99 | 1.00 | 0.60                   | 0.69 | 0.74 | 0.77 | 0.80 | 0.82 | 0.83 |
| Wine                     | 0.65                                             | 0.75 | 0.82 | 0.86 | 0.89 | 0.92 | 0.94 | 0.64                   | 0.74 | 0.80 | 0.84 | 0.87 | 0.89 | 0.90 |
| Fermented cereals/grains | 0.58                                             | 0.67 | 0.73 | 0.76 | 0.79 | 0.81 | 0.83 | 0.51                   | 0.6  | 0.66 | 0.71 | 0.74 | 0.77 | 0.79 |
| Brown bread              | 0.32                                             | 0.43 | 0.52 | 0.6  | 0.67 | 0.72 | 0.77 | 0.28                   | 0.37 | 0.44 | 0.50 | 0.54 | 0.58 | 0.62 |
| White bread              | 0.27                                             | 0.35 | 0.42 | 0.47 | 0.52 | 0.56 | 0.59 | 0.26                   | 0.33 | 0.39 | 0.44 | 0.48 | 0.51 | 0.53 |
| Wholegrain bread         | 0.47                                             | 0.59 | 0.67 | 0.73 | 0.78 | 0.82 | 0.85 | 0.47                   | 0.58 | 0.66 | 0.71 | 0.76 | 0.79 | 0.82 |
| Rye bread                | 0.59                                             | 0.71 | 0.8  | 0.86 | 0.91 | 0.94 | 0.97 | 0.54                   | 0.63 | 0.69 | 0.74 | 0.77 | 0.79 | 0.81 |
| Other bread              | 0.19                                             | 0.27 | 0.35 | 0.41 | 0.47 | 0.53 | 0.57 | 0.20                   | 0.28 | 0.35 | 0.41 | 0.46 | 0.51 | 0.56 |
| Pastries                 | 0.23                                             | 0.33 | 0.42 | 0.5  | 0.58 | 0.65 | 0.72 | 0.25                   | 0.34 | 0.43 | 0.51 | 0.57 | 0.63 | 0.69 |
| Chocolate                | 0.32                                             | 0.41 | 0.48 | 0.54 | 0.59 | 0.62 | 0.65 | 0.33                   | 0.41 | 0.48 | 0.53 | 0.56 | 0.60 | 0.62 |
| Fermented dairy          | 0.52                                             | 0.59 | 0.64 | 0.67 | 0.70 | 0.71 | 0.73 | 0.60                   | 0.70 | 0.76 | 0.8  | 0.83 | 0.86 | 0.88 |
| Cheeses                  | 0.42                                             | 0.53 | 0.61 | 0.67 | 0.71 | 0.75 | 0.78 | 0.41                   | 0.52 | 0.59 | 0.65 | 0.7  | 0.73 | 0.76 |
| Yoghurts                 | 0.53                                             | 0.67 | 0.76 | 0.83 | 0.88 | 0.93 | 0.96 | 0.53                   | 0.66 | 0.75 | 0.82 | 0.87 | 0.92 | 0.95 |
| Quark                    | 0.15                                             | 0.18 | 0.21 | 0.22 | 0.23 | 0.24 | 0.25 | 0.14                   | 0.17 | 0.20 | 0.21 | 0.22 | 0.23 | 0.24 |
| Buttermilk <sup>b</sup>  | -                                                | -    | -    | -    | -    | -    | -    | -                      | -    | -    | -    | -    | -    | -    |
| Non-fermented dairy      | 0.69                                             | 0.79 | 0.86 | 0.9  | 0.93 | 0.96 | 0.98 | 0.69                   | 0.79 | 0.85 | 0.89 | 0.92 | 0.94 | 0.96 |
| Butter                   | 0.65                                             | 0.77 | 0.84 | 0.89 | 0.92 | 0.95 | 0.97 | 0.64                   | 0.74 | 0.81 | 0.86 | 0.89 | 0.91 | 0.94 |
| Cream                    | 0.33                                             | 0.39 | 0.43 | 0.45 | 0.47 | 0.49 | 0.50 | 0.32                   | 0.38 | 0.42 | 0.45 | 0.47 | 0.48 | 0.49 |
| Ice cream                | 0.20                                             | 0.29 | 0.37 | 0.44 | 0.51 | 0.57 | 0.63 | 0.18                   | 0.26 | 0.33 | 0.39 | 0.45 | 0.50 | 0.55 |
| Milk                     | 0.57                                             | 0.63 | 0.66 | 0.69 | 0.7  | 0.71 | 0.72 | 0.57                   | 0.63 | 0.66 | 0.69 | 0.70 | 0.71 | 0.72 |
| Non-fermented soya       | 0.6                                              | 0.66 | 0.7  | 0.72 | 0.74 | 0.75 | 0.76 | 0.61                   | 0.67 | 0.70 | 0.72 | 0.74 | 0.75 | 0.76 |

<sup>a</sup> Crude and energy-adjusted attenuation factors reported for each number of 24-h recalls, ranging from 2 to 8.

<sup>b</sup> For buttermilk, the error model did not converge due to the low variance of the person-specific biases compared to the within- and between-person variances and are therefore not reported.
