# Supplementary material for: Prevalence of fermented foods in the Dutch adult diet and validation of a food frequency questionnaire for estimating their intake in the NQplus cohort
Source: PubMed Central journal article supplement (PMC7712622; doi:10.1186/s40795-020-00394-z), 2020-12-03
Supplement: 40795_2020_394_MOESM4_ESM.pdf [file 40795_2020_394_MOESM4_ESM.pdf]

**Figure S1.** Bland-Altman plots demonstrating relative validity of the FFQ versus 24-h recalls for fermented food subgroups. Group-level relative validity shown for the following subgroups: **(a)** beer, **(b)** coffee, **(c)** wine, **(d)** brown bread, **(e)** white bread, **(f)** wholegrain and wholemeal bread, **(g)** rye bread, **(h)** other bread, **(i)** pastries, **(j)** cheeses, **(k)** yoghurts, **(l)** quark, and **(m)** buttermilk. The middle line indicates the mean difference, while the upper and lower lines indicate the 95% confidence intervals, respectively [calculated as: mean  $\pm$  (standard deviation of the mean difference  $\times$  1.96)].



(g)



(h)



(i)



(j)



(k)



(l)



(m)
