# Supplementary material for: Prevalence of fermented foods in the Dutch adult diet and validation of a food frequency questionnaire for estimating their intake in the NQplus cohort
Source: PubMed Central journal article supplement (PMC7712622; doi:10.1186/s40795-020-00394-z), 2020-12-03
Supplement: 40795_2020_394_MOESM6_ESM.pdf [file 40795_2020_394_MOESM6_ESM.pdf]

**Table S4 Sex-Specific Spearman's Correlations for Fermented and Non-Fermented Foods**

| Food Group               | Spearman's Rank Correlation Coefficient ( $r_s$ ) |                 |                  |                 |
|--------------------------|---------------------------------------------------|-----------------|------------------|-----------------|
|                          | Male (n = 425)                                    |                 | Female (n = 384) |                 |
|                          | Crude                                             | Energy-Adjusted | Crude            | Energy-Adjusted |
| Fermented beverages      | 0.72**                                            | 0.73**          | 0.80**           | 0.80**          |
| Coffee                   | 0.69**                                            | 0.69**          | 0.79**           | 0.79**          |
| Beer                     | 0.67**                                            | 0.66**          | 0.49**           | 0.57**          |
| Wine                     | 0.75**                                            | 0.69**          | 0.74**           | 0.73**          |
| Fermented cereals/grains | 0.65**                                            | 0.64**          | 0.64**           | 0.63**          |
| Brown bread              | 0.27**                                            | 0.26**          | 0.22**           | 0.23**          |
| White bread              | 0.26**                                            | 0.28**          | 0.43**           | 0.42**          |
| Wholegrain bread         | 0.56**                                            | 0.53**          | 0.66**           | 0.64**          |
| Rye bread                | 0.47**                                            | -0.16**         | 0.38**           | 0.63**          |
| Other bread              | 0.09                                              | 0.27**          | 0.15**           | 0.22**          |
| Pastries                 | 0.24**                                            | 0.40**          | 0.17**           | 0.24**          |
| Chocolate                | 0.38**                                            | 0.38**          | 0.32**           | 0.30**          |
| Fermented dairy          | 0.70**                                            | 0.70**          | 0.65**           | 0.65**          |
| Cheeses                  | 0.45**                                            | 0.45**          | 0.46**           | 0.43**          |
| Yoghurts                 | 0.58**                                            | 0.59**          | 0.52**           | 0.52**          |
| Quark                    | 0.14**                                            | -0.48**         | 0.14**           | 0.39**          |
| Buttermilk               | 0.12*                                             | 0.37**          | 0.07             | -0.23**         |
| Non-fermented dairy      | 0.66**                                            | 0.65**          | 0.70**           | 0.69**          |
| Butter                   | 0.45**                                            | 0.60**          | 0.52**           | 0.26**          |
| Cream                    | 0.21**                                            | 0.25**          | 0.18**           | 0.17**          |
| Ice cream                | 0.22**                                            | 0.21**          | 0.26**           | 0.28**          |
| Milk                     | 0.64**                                            | 0.64**          | 0.70**           | 0.70**          |
| Non-fermented soya       | 0.30**                                            | -0.50**         | 0.46**           | 0.68**          |

FFQ, food frequency questionnaire. \*, p&lt;0.05; \*\*, p&lt;0.01.
